# Supplementary material
Source: ML conference proceedings conference paper supplement (https://proceedings.neurips.cc/paper_files/paper/2022/hash/68d88dcd1e1917c74993902073f08e40-Abstract.html)
Supplement: Supplementary file 1 [file 68d88dcd1e1917c74993902073f08e40-Supplemental-Conference.zip]

Archive with 1 entries (1 files):
- NeurIPS_CAP-UDF_supp.pdf
